# Supplementary material
Source: PubMed Central journal article supplement (PMC2907453)
Supplement: NIHMS213448-supplement-1.pdf [file NIHMS213448-supplement-1.pdf]

## **SUPPLEMENTAL MATERIAL**

### **Impaired Macrophage Migration Inhibitory Factor (MIF)-AMPK Activation and Ischemic Recovery in the Senescent Heart**

Heng Ma\*, MD, PhD; Jingying Wang\*, BS; D Paul Thomas, PhD; Chao Tong, MS; Lin Leng, PhD; Wenkui Wang, PhD; Melanie Merk, PhD; Swen Zierow, PhD; Jürgen Bernhagen, PhD; Jun Ren, MD, PhD; Richard Bucala, MD, PhD; Ji Li, PhD

#### **Supplemental Methods**

##### **Experimental Animals**

Male C57BL/6 mice, 4-6 and 24-26 months of age (NIA, Baltimore, MD) and male transgenic mice (C57BL/6) that express a kinase dead (KD) rat  $\alpha 2$  isoform (K45R mutation) driven by the muscle creatine kinase promoter were gifts from Dr. M. Birnbaum.<sup>1</sup> MIF KO mice<sup>2</sup> were backcrossed into the C57BL/6 background (generation N10) at the Yale Animal Resource Center. MIF-receptor KO mice (CD74-KO, C57BL/6) were originally from Jackson Laboratories.<sup>3</sup> All animal procedures carried out in this study were approved by the University of Wyoming and University at Buffalo-SUNY Institutional Animal Care and Use Committee.

##### **Echocardiographic Assessment**

Cardiac geometry and function were evaluated in anesthetized (Avertin 2.5%, 10  $\mu$ l/g body wt i.p.) mice using two-dimensional guided M-mode echocardiography (Phillips SONOS 5500) equipped with a 15-6 MHz linear transducer (Phillips Medical Systems, Andover, MD). Anterior and posterior left ventricular wall thicknesses and diameters were recorded in both diastole and systole from M-mode images using methods adopted by the American Society of Echocardiography. Fractional shortening was calculated from end-diastolic diameter (EDD) and

end-systolic diameter (ESD) using the equation of  $(EDD-ESD)/EDD$ . Estimated echocardiographically-derived left ventricular (LV) mass was calculated as  $[(LVEDD + \text{septal wall thickness} + \text{posterior wall thickness})^3 - LVEDD^3] \times 1.055$ , where 1.055 ( $\text{mg}/\text{mm}^3$ ) is the density of myocardium. Heart rates were averaged over 10 cardiac cycles.<sup>4</sup>

### **Activity of AMPK, LKB1 and CaMKK $\beta$**

Isoform-specific ( $\alpha 1$  and  $\alpha 2$ ) AMPK activity, LKB1 activity and CaMKK $\beta$  activity were determined using a previously described immune complex kinase assay.<sup>5-7</sup> AMPK, LKB1 or CaMKK $\beta$  was immunopurified from heart lysates with protein G/A Sepharose coupled to  $\alpha$  subunit isoform-specific AMPK antibodies, LKB1 antibody or CaMKK $\beta$  antibody. The immunocomplexes were washed extensively and AMPK activity was determined with the SAMS peptide (HMRSAMSGHLHLVKRR), LKB1 activity was determined with the LKBtide peptide (SNLYHQGKFLQTFGSPLYRRR), CaMKK $\beta$  activity was determined with recombinant AMPK ( $\alpha_2\beta_1\gamma_1$ ).

### **Mouse Heart Perfusion and Measurement of Cardiac Function**

Mice were deeply anesthetized with sodium pentobarbital (5–10 mg i.p.) and hearts were excised and placed in the Langendorff mode with KHB containing 7 mmol/L glucose, 0.4 mmol/L oleate, 1% BSA, and 10  $\mu\text{U}/\text{mL}$  insulin.<sup>8-10</sup> Hearts were perfused for 30 min at a flow of 4 ml/min, followed by either: [1] 20 min of global ischemia; [2] 20 min of global ischemia followed by 30 minutes of reperfusion, or additional control perfusion; [3] 20 min of global ischemia followed by 2 hr of reperfusion. A fluid-inflated balloon connected to the Chart5 system from AD Instruments was inserted into the left ventricle to measure LVDP, the first derivative of LVDP (dP/dt) and heart rate. As used herein, dP/dt is the first derivative of LV pressure and can be measured in the systolic phase (+dP/dt) or in the diastolic phase (-dP/dt) The balloon was filled

to achieve a baseline LV end-diastolic pressure of 5 mm Hg and its volume was kept constant during ischemia and reperfusion. Hearts were freeze-clamped<sup>11</sup> in liquid nitrogen at the end of the perfusion period.

### **Immunoblotting**

Immunoblots were performed as previously described.<sup>12</sup> Heart homogenates were resolved by SDS-PAGE and the proteins transferred onto polyvinylidene difluoride membranes. For reprobing, membranes were stripped with 50 mmol/L Tris-HCl, 2% SDS, and 0.1 mol/L  $\beta$ -mercaptoethanol (pH 6.8). Rabbit polyclonal antibodies against phospho-AMPK, total AMPK and HIF-1 $\alpha$  were purchased from Cell Signaling. Rabbit polyclonal antibodies against MIF and  $\beta$ -tubulin were obtained from Santa Cruz.

### **mRNA Analysis by Real-time PCR**

Heart RNA was isolated using TRIzol<sup>®</sup> reagent (Invitrogen) and RNeasy (Qiagen). cDNA was synthesized using the ThermoScript<sup>™</sup> RT-PCR system (Invitrogen) at a concentration of 100 ng RNA/ $\mu$ l cDNA. The iCycler Q-PCR machine and SYBR Green Supermix from Bio-Rad were used.<sup>13</sup> All reactions had a correlation coefficient of  $\geq 0.98$ , efficiency in the 90–110% range, and were performed in duplicate. For each target gene, a standard curve was constructed and the starting quantity (SQ) of mRNA was calculated using the Bio-Rad iCycler iQ Real-Time PCR Detection System Software. Results for each sample were normalized by dividing the SQ of the target gene by the SQ of  $\beta$ -actin for that same sample. The specific amplification of the desired target gene was verified by the correlation coefficient of the standard curve of  $\geq 0.98$ , the appearance of a single peak in the melting curve at the predicted temperature, and the appearance of a single band of the predicted length upon gel electrophoresis. Table 1 shows the specific primers and reaction conditions.

Table 1. Quantitative PCR primers<sup>a</sup>

| Accession#                     | Sense Primer 5' to 3'     | Exon | Position |
|--------------------------------|---------------------------|------|----------|
|                                | Antisense Primer 5' to 3' |      |          |
| NM_010798<br>(MIF)             | CGGACCGGGTCTACATCAA       | 2    | 357      |
|                                | TCAAGCGAAGGTGGAACCGTT     | 3    | 430      |
| NM_007393<br>( $\beta$ -actin) | AGAGGGAAATCGTGCGTGAC      | 4    | 693      |
|                                | CAATAGTGATGACCTGGCCGT     | 4    | 830      |

<sup>a</sup>The primers were designed using the Beacon Designer Software from Bio-Rad. The reactions employed SYBR Green Supermix and the conditions were: 1 cycle of 95°C for 3 min; 40 cycles of 95°C for 15 sec followed by 60°C for 1 min.

### MIF Assay

MIF concentration was measured by a one-step sandwich enzyme-linked immunosorbent assay as previously reported method (detection limit, 0.16 ng/ml).<sup>2</sup>

### Isolation of Mouse Cardiomyocytes and Measurement of Cardiomyocyte Contractile

#### Function

Cardiomyocytes were enzymatically isolated as described previously.<sup>14, 15</sup> The mechanical properties of cardiomyocytes were assessed using a SoftEdge MyoCam system (IonOptix Corporation, Milton, MA).<sup>15</sup> IonOptix SoftEdge software was used to capture changes in cell length during shortening and re-lengthening. Cell shortening and re-lengthening were assessed using the following indices: peak shortening (PS), the amplitude myocytes shortened on electrical stimulation, which is indicative of peak ventricular contractility; time-to-PS (TPS), the duration of myocyte shortening, which is indicative of systolic duration; time-to-90% re-lengthening (TR90); the duration to reach 90% re-lengthening, which is indicative of diastolic duration (90% rather 100% re-lengthening was used to avoid noisy signal at baseline concentration); and maximal velocities of shortening/re-lengthening, maximal slope (derivative)

of shortening and re-lengthening phases, which is indicative of maximal velocities of ventricular pressure increase/decrease.

### **Recombinant MIF**

Human or mouse recombinant MIF was prepared from an *E. coli* expression system, purified by sequential column chromatography and re-natured under endotoxin free conditions<sup>16</sup>.

### **MIF Adenovirus Delivery**

MIF adenoviruses were generated following the instructions of ViraPower™ Adenoviral Expression System from Invitrogen.<sup>17</sup> Briefly, the cDNA for MIF or lacZ (negative control) was cloned into the ViraPower Adenovirus Expression System (Invitrogen) and resulting viral titers were determined using the Adeno-X-Rapid Titer-Kit (BD Biosciences Clontech). Mice were anesthetized with a ketamine (100 mg/kg)-xylazine (8 mg/kg) mixture, intubated, and ventilated with room air. Access to the thoracic cavity was obtained via a lateral sternotomy at the level of the second intercostal. The heart was lifted from the thoracic cavity, and a stitch was placed at the apex of the heart using an 8-0 suture to allow manipulation of the heart. Adenovirus ( $5 \times 10^9$  IFU/ml) was administered by direct injection in the LV free wall (5 sites, 10  $\mu$ l/site) using an insulin syringe with a 29-gauge needle. After virus injection, a 22-gauge plastic cannula was inserted through the chest wall to evacuate residual air following closure of the chest cavity with 5-0 vicryl suture. After any trapped air was evacuated by gentle suction, the 22-gauge cannula was removed, and the mouse was taken off the ventilator and allowed to recover. Myocardial MIF expression was analyzed 24 hours later by western blot. For mice injected with adenovirus expressing MIF or negative control, cardiac function was measured 24 hours following adv-MIF delivery.

### **High-energy Phosphate Measurements**

The tissue content of AMP and ATP was measured in neutralized perchloric acid extracts of frozen tissue by HPLC, as previously described<sup>18-20</sup>.

### **Measurement of Glycogen Content**

Glycogen content was measured in frozen left ventricular tissue as previously described<sup>21</sup>.

Briefly, glycogen was extracted from about 20 mg of tissue and hydrolyzed with 4 M H<sub>2</sub>SO<sub>4</sub> to glucose, which was measured using a Sigma glucose analysis kit.

### Supplemental Table 1

#### Gross and Echocardiographic Parameters from Young Adult (4-6 months) and Aged (24-26 months) Mice

| Mouse group                           | Young       | Aged        |
|---------------------------------------|-------------|-------------|
| Body weight(BW, g)                    | 26.8 ± 1.2  | 35.3 ± 0.9* |
| Heart weight (HW, mg)                 | 155 ± 9     | 181 ± 10*   |
| HW/BW (mg/g)                          | 5.75 ± 0.29 | 5.13 ± 0.45 |
| Wall thickness (mm)                   | 0.82±0.03   | 0.86±0.07   |
| LV diastolic diameter (mm)            | 3.09±0.04   | 3.02±0.05   |
| LV systolic diameter (mm)             | 1.61±0.08   | 1.68±0.05   |
| Normalized LV mass (mg/g)             | 2.17±0.5    | 2.25±0.3    |
| Fractional shortening (%)             | 47.6±1.5    | 44.5±2.3    |
| Heart rate (beats.min <sup>-1</sup> ) | 442±18      | 451±25      |

Values are means ± SEM, n=10 for both groups, \**P*<0.05 vs. young

### Supplemental Table 2

#### Gross and Echocardiographic Parameters from WT, AMPK KD, MIF KO and CD74 KO Mice

| Mouse group                           | WT          | AMPK KD     | MIF KO      | CD74 KO    |
|---------------------------------------|-------------|-------------|-------------|------------|
| Body weight (g)                       | 26.8 ± 1.2  | 30.4 ± 1.5  | 32.3 ± 1.8  | 31.8± 1.3  |
| Heart weight (mg)                     | 155 ± 9     | 159 ± 11    | 186 ± 10    | 179± 14    |
| Heart/weight (mg/g)                   | 5.75 ± 0.29 | 5.23 ± 0.29 | 5.76 ± 0.41 | 5.63± 0.32 |
| Wall thickness (mm)                   | 0.82±0.03   | 0.91±0.05   | 1.02±0.07   | 0.93±0.04  |
| LV diastolic diameter (mm)            | 3.09±0.04   | 2.97±0.04   | 3.08±0.05   | 3.16±0.06  |
| LV systolic diameter (mm)             | 1.61±0.08   | 1.72±0.03   | 1.78±0.05   | 1.77±0.07  |
| Normalized LV mass (mg/g)             | 2.17±0.5    | 2.37±0.3    | 2.74±0.5    | 2.41±0.3   |
| Fractional shortening (%)             | 47.6±1.5    | 42.3±2.3    | 42.5±1.6    | 43.9±2.1   |
| Heart Rate (beats.min <sup>-1</sup> ) | 442±18      | 465±30      | 448±19      | 453±25     |

Values are means ± SEM, n=10 for each group

## Supplemental Figures and Figure Legends

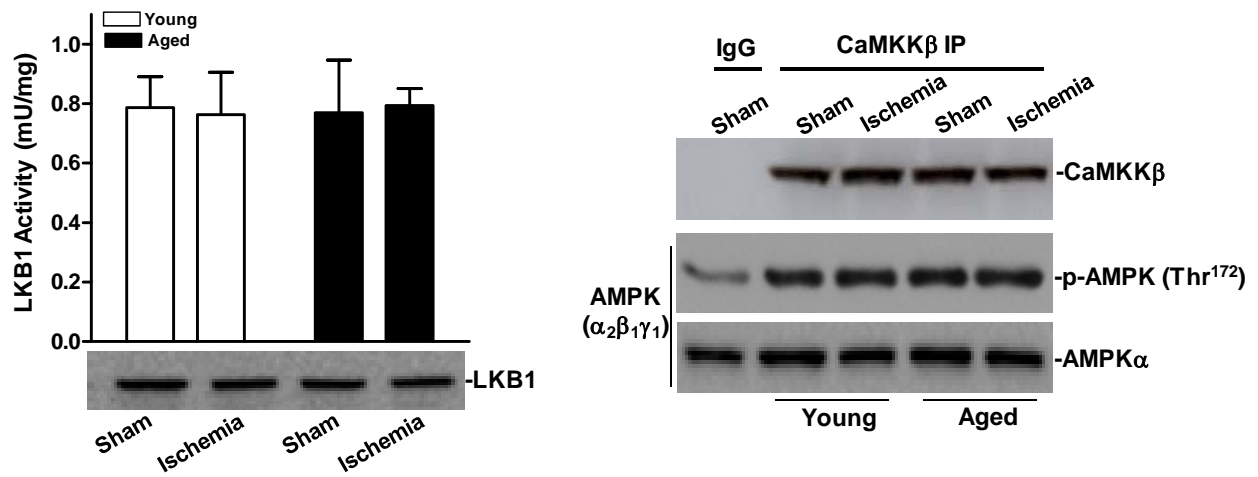

**Supplemental Figure 1.** Activities of LKB1 and CaMKK $\beta$ . A, LKB1 activity in response to *in vivo* regional ischemia (LAD occlusion 20 min) in young and aged hearts, equal amounts of protein (40  $\mu$ g) from sham operation or ischemic area of heart extracts were immunoblotted with LKB1 antibody. LKB1 was immunoprecipitated and assayed, employing the LKBtide peptide, n=4 per group. B, CaMKK $\beta$  activity in response to *in vivo* regional ischemia (20 min) in young and aged hearts; equal amounts of protein (500  $\mu$ g) from sham operation or ischemic area of heart extracts were immunoprecipitated with CaMKK $\beta$  antibody, CaMKK $\beta$  activity was assayed, employing recombinant AMPK ( $\alpha_2\beta_1\gamma_1$ ), n=4 per group.



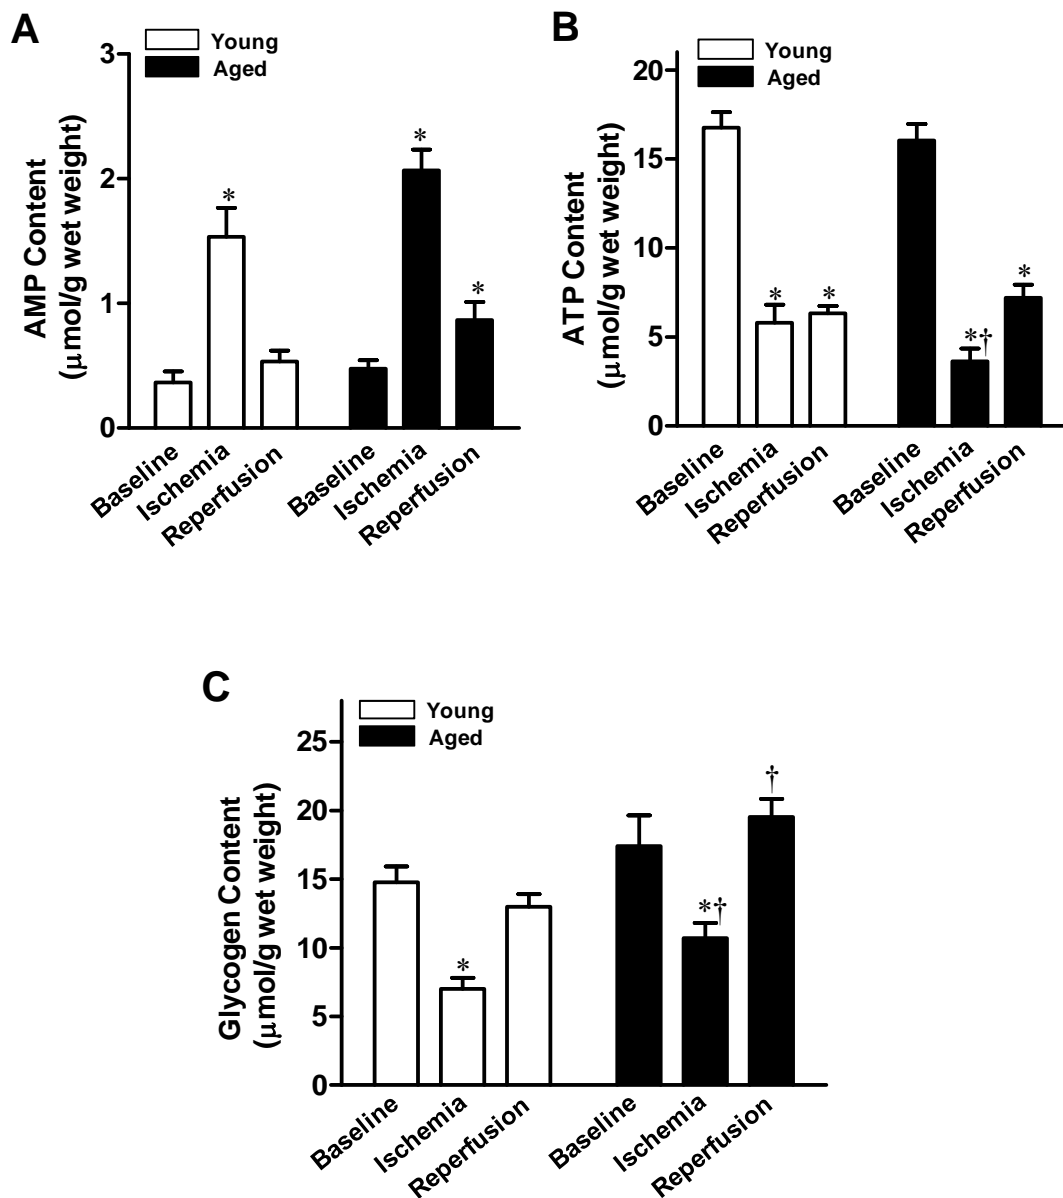

**Supplemental Figure 2.** Myocardial AMP (A), ATP (B) and glycogen (C) content at baseline perfusion, *ex vivo* ischemia, and following reperfusion in the young and aged hearts. The content of AMP and ATP was measured in neutralized perchloric acid extracts of frozen tissue by HPLC; the glycogen was extracted from about 20 mg of tissue and hydrolyzed with 4 M H<sub>2</sub>SO<sub>4</sub> to glucose, which was measured using a Sigma glucose analysis kit, n=4 per group. \**P*<0.05 vs. baseline, respectively, †*P*<0.05 vs. young ischemia or reperfusion, respectively.

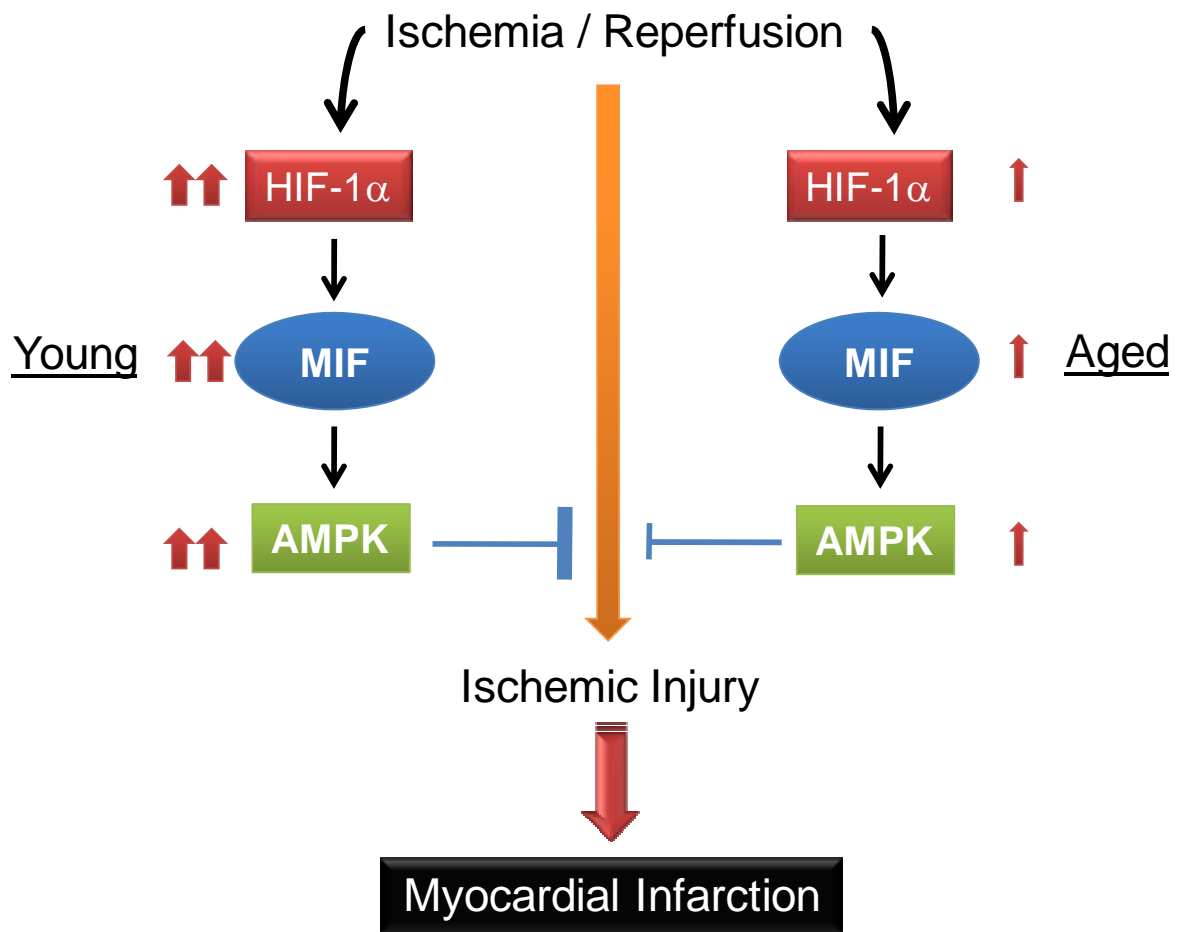

**Supplemental Figure 3.** A model for aging-associated decrease capacity in the HIF-1 $\alpha$  -MIF axis in the heart may contribute to a blunted AMPK activation in response to ischemia in senescent heart.

## Supplemental References

1. Mu J, Brozinick JT, Jr., Valladares O, Bucan M, Birnbaum MJ. A role for AMP-activated protein kinase in contraction- and hypoxia-regulated glucose transport in skeletal muscle. *Mol Cell*. 2001;7:1085-1094.
2. Mizue Y, Ghani S, Leng L, McDonald C, Kong P, Baugh J, Lane SJ, Craft J, Nishihira J, Donnelly SC, Zhu Z, Bucala R. Role for macrophage migration inhibitory factor in asthma. *Proc Natl Acad Sci U S A*. 2005;102:14410-14415.
3. Leng L, Metz CN, Fang Y, Xu J, Donnelly S, Baugh J, Delohery T, Chen Y, Mitchell RA, Bucala R. MIF signal transduction initiated by binding to CD74. *J Exp Med*. 2003;197:1467-1476.
4. Fang CX, Dong F, Thomas DP, Ma H, He L, Ren J. Hypertrophic cardiomyopathy in high-fat diet-induced obesity: role of suppression of forkhead transcription factor and atrophy gene transcription. *Am J Physiol*. 2008;295:H1206-H1215.
5. Bak MI, Wei JY, Ingwall JS. Interaction of hypoxia and aging in the heart: analysis of high energy phosphate content. *J Mol Cell Cardiol*. 1998;30:661-672.
6. Sakamoto K, Zarrinpashneh E, Budas GR, Pouleur AC, Dutta A, Prescott AR, Vanoverschelde JL, Ashworth A, Jovanovic A, Alessi DR, Bertrand L. Deficiency of LKB1 in heart prevents ischemia-mediated activation of AMPKalpha2 but not AMPKalpha1. *Am J Physiol Endocrinol Metab*. 2006;290:E780-788.
7. Anderson KA, Means RL, Huang QH, Kemp BE, Goldstein EG, Selbert MA, Edelman AM, Freneau RT, Means AR. Components of a calmodulin-dependent protein kinase cascade. Molecular cloning, functional characterization and cellular localization of Ca<sup>2+</sup>/calmodulin-dependent protein kinase kinase beta. *J Biol Chem*. 1998;273:31880-31889.
8. Szczesna-Cordary D, Jones M, Moore JR, Watt J, Kerrick WG, Xu Y, Wang Y, Wagg C, Lopaschuk GD. Myosin regulatory light chain E22K mutation results in decreased cardiac intracellular calcium and force transients. *FASEB J*. 2007;21:3974-3985.
9. Miller EJ, Li J, Leng L, McDonald C, Atsumi T, Bucala R, Young LH. Macrophage migration inhibitory factor stimulates AMP-activated protein kinase in the ischaemic heart. *Nature*. 2008;451:578-582.
10. Russell RR, 3rd, Li J, Coven DL, Pypaert M, Zechner C, Palmeri M, Giordano FJ, Mu J, Birnbaum MJ, Young LH. AMP-activated protein kinase mediates ischemic glucose uptake and prevents postischemic cardiac dysfunction, apoptosis, and injury. *J Clin Invest*. 2004;114:495-503.
11. Rohrbach S, Teichert S, Niemann B, Franke C, Katschinski DM. Caloric restriction counteracts age-dependent changes in prolyl-4-hydroxylase domain (PHD) 3 expression. *Biogerontology*. 2008;9:169-176.
12. Li J, Miller EJ, Ninomiya-Tsuji J, Russell RR, 3rd, Young LH. AMP-activated protein kinase activates p38 mitogen-activated protein kinase by increasing recruitment of p38 MAPK to TAB1 in the ischemic heart. *Circ Res*. 2005;97:872-879.
13. Kevill KA, Bhandari V, Kettunen M, Leng L, Fan J, Mizue Y, Dzuira JD, Reyes-Mugica M, McDonald CL, Baugh JA, O'Connor CL, Aghai ZH, Donnelly SC, Bazyz-Asaad A, Bucala RJ. A role for macrophage migration inhibitory factor in the neonatal respiratory distress syndrome. *J Immunol*. 2008;180:601-608.

14. Dong F, Zhang X, Yang X, Esberg LB, Yang H, Zhang Z, Culver B, Ren J. Impaired cardiac contractile function in ventricular myocytes from leptin-deficient ob/ob obese mice. *J Endocrinol.* 2006;188:25-36.
15. Li Q, Ceylan-Isik AF, Li J, Ren J. Deficiency of insulin-like growth factor 1 reduces sensitivity to aging-associated cardiomyocyte dysfunction. *Rejuvenation Res.* 2008;11:725-733.
16. Bernhagen J, Mitchell RA, Calandra T, Voelter W, Cerami A, Bucala R. Purification, bioactivity, and secondary structure analysis of mouse and human macrophage migration inhibitory factor (MIF). *Biochemistry.* 1994;33:14144-14155.
17. Merk M, Baugh J, Zierow S, Leng L, Pal U, Lee SJ, Ebert AD, Mizue Y, Trent JO, Mitchell R, Nickel W, Kavathas PB, Bernhagen J, Bucala R. The Golgi-associated protein p115 mediates the secretion of macrophage migration inhibitory factor. *J Immunol.* 2009;182:6896-6906.
18. Ally A, Park G. Rapid determination of creatine, phosphocreatine, purine bases and nucleotides (ATP, ADP, AMP, GTP, GDP) in heart biopsies by gradient ion-pair reversed-phase liquid chromatography. *J Chromatogr.* 1992;575:19-27.
19. Saddik M, Lopaschuk GD. Myocardial triglyceride turnover and contribution to energy substrate utilization in isolated working rat hearts. *J Biol Chem.* 1991;266:8162-8170.
20. Zhao P, Wang J, He L, Ma H, Zhang X, Zhu X, Dolence EK, Ren J, Li J. Deficiency in TLR4 signal transduction ameliorates cardiac injury and cardiomyocyte contractile dysfunction during ischemia. *J Cell Mol Med.* 2009;13:1513-1525.
21. Jaswal JS, Gandhi M, Finegan BA, Dyck JR, Clanachan AS. Effects of adenosine on myocardial glucose and palmitate metabolism after transient ischemia: role of 5'-AMP-activated protein kinase. *Am J Physiol Heart Circ Physiol.* 2006;291:H1883-1892.
